# Supplementary material for: Cholesterol Efflux Capacity of Apolipoprotein A-I Varies with the Extent of Differentiation and Foam Cell Formation of THP-1 Cells
Source: J Lipids. 2016 Nov 9;2016:9891316. doi: 10.1155/2016/9891316 (PMC5120203; doi:10.1155/2016/9891316)
Supplement: Supplementary file 1 — Supplementary Fig1: The purity of apoA-I. Supplementary Fig2: The amount of Total and Medium 3H-cholesterol. Supplementary Fig3: ABCA1 expression on THP-1 cells treated with PMA for different periods. Supplementary Fig4: ABCA1 expression on THP-1 cells loaded with acLDL for different periods. [file 9891316.f1.pdf]

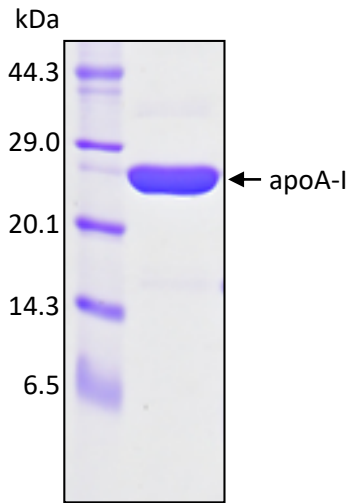

HDL was isolated from serum by ultracentrifugation and delipidated with ethanol/ether. Sample was applied to S-200-HR column and apoA-I fraction was isolated. The fraction was subjected to 12.5% SDS-PAGE (6  $\mu$ g protein/lane) followed by staining with coomassie brilliant blue (CBB).

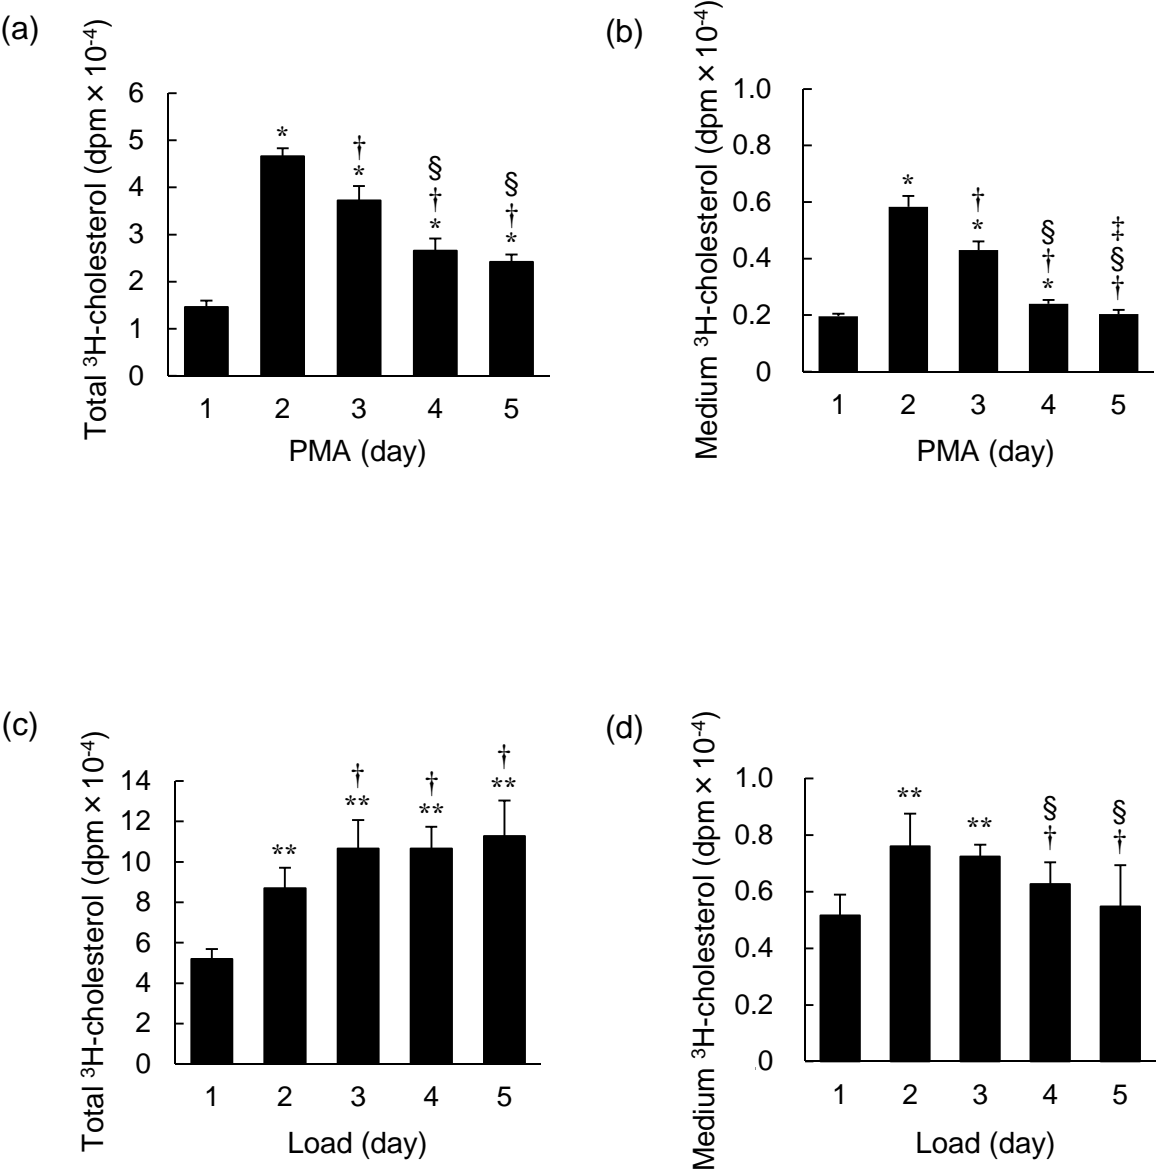

A graph shows the relationship between Total  $^3\text{H}$ -cholesterol or Medium  $^3\text{H}$ -cholesterol and period of PMA treatment (a, b) or Load treatment (c, d). The values were indicated by mean  $\pm$  SD ( $n=3$  (a, b) or  $n=6$  (c, d), \* $P < 0.05$  versus day 1, \*\* $P < 0.01$  versus day 1, † $P < 0.05$  versus day 2, § $P < 0.05$  versus day 3, ‡ $P < 0.05$  versus day 4).

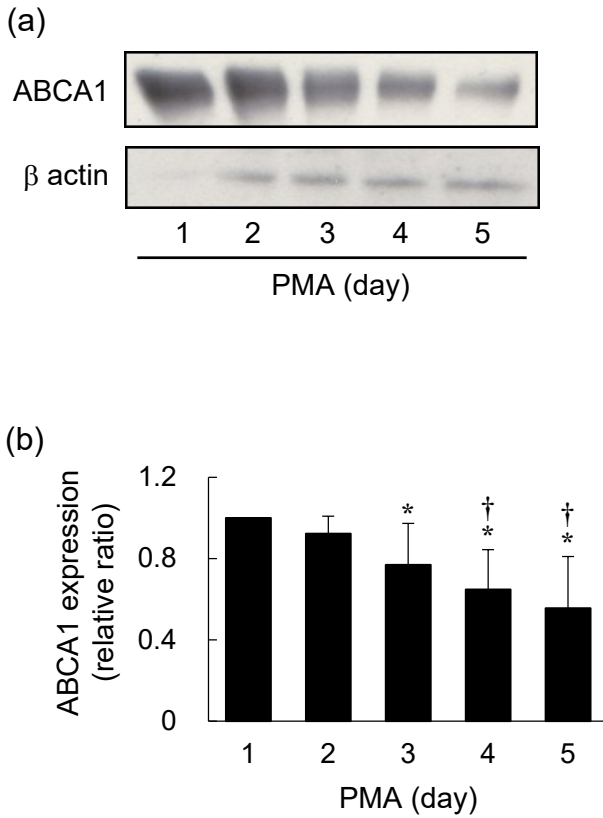

(a) THP-1 cells were treated with 100 ng/mL PMA for 1 to 5 days and loaded with acLDL (50  $\mu$ g/mL) and T0901317 (1  $\mu$ mol/L) for 1 day. After equilibration, cells were lysed using RIPA buffer containing protease inhibitors. Then lysates (4  $\mu$ g/lane) were separated by SDS-PAGE (7% polyacrylamide gel) and detected with ABCA1 or  $\beta$ -actin antibodies. (b) The expression of ABCA1 also shows bar graphs for each day relative to day 1. The values were indicated by mean  $\pm$  SD (n=3 \*P < 0.05 versus day 1, †P < 0.05 versus day 2).

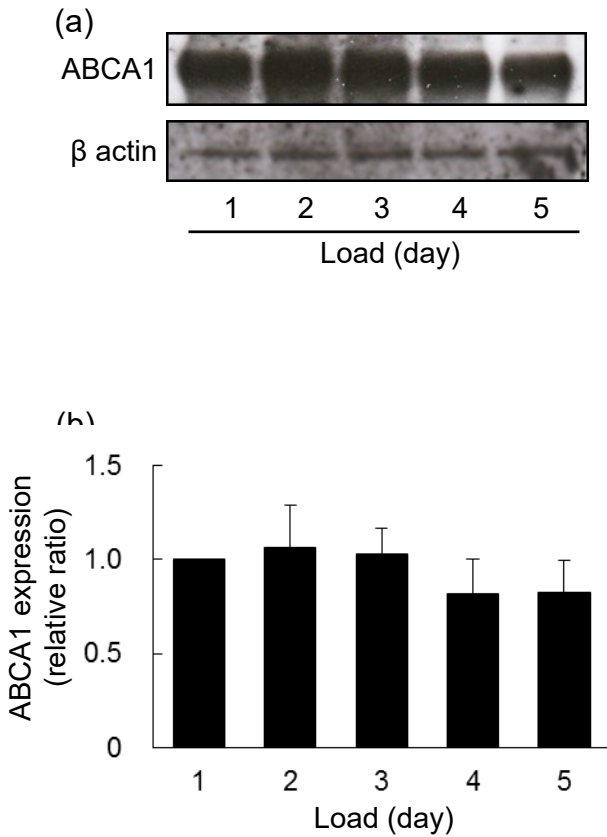

(a) After PMA treatment for 2 days, THP-1 cells were loaded with acLDL (50  $\mu\text{g/mL}$ ) and T0901317 (1  $\mu\text{mol/L}$ ) for different periods (1 to 5 days). After equilibration, cells were lysed using RIPA buffer containing protease inhibitors. Then lysates (4  $\mu\text{g/lane}$ ) were separated by SDS-PAGE (7% polyacrylamide gel) and detected with ABCA1 or  $\beta$ -actin antibodies. (b) The expression of ABCA1 also shows bar graphs for each day relative to day 1. The values were indicated by mean  $\pm$  SD ( $n=3$ ).
